# A comparison of fishery models with and without cannibalism with implications for the management of the Cape hake resource off southern Africa

Andre E. Punt, and Ray Hilborn

Punt, A. E., and Hilborn, R. 1994. A comparison of fishery models with and without cannibalism with implications for the management of the Cape hake resource off southern Africa. - ICES J. mar. Sci., 51: 19–29.

An age-aggregated model that explicitly includes cannibalism of older fish on younger fish is developed. This model is used as the basis for determining the importance of including cannibalism in stock assessment and fishery regulation for the Cape hake stocks off southern Africa, stocks where cannibalism has been shown to be substantial. The cannibalism model is compared to a traditional Schaefer-type model in three ways. First, the two models are fitted to the catch-and-effort history for the Cape hake resource off northern Namibia. It is shown that the cannibalism parameters cannot be estimated from the catch-and-effort history alone, and must be obtained from other studies. Once the cannibalism parameters are specified, the two approaches provide similar fits and estimates of stock size and potential yield, although the non-cannibalistic approach is generally more optimistic. The second form of comparison involves fitting a cannibalistic model-estimation procedure and a non-cannibalistic model-estimation procedure to simulated data that contains differing levels of cannibalism. In general, both model-estimation procedures produce similar results, although the non-cannibalistic model-estimation procedure is more likely to result in outlying estimates of MSY when the data are uninformative. Finally, the performance of the two model-estimation procedures when combined with the  $f_{MSY}$  harvesting strategy is evaluated. The performance of the two approaches is similar as long as the data are relatively informative. It is thus argued that management agencies should not assume *a priori* that including cannibalism or multispecies interactions in assessment and management procedures will necessarily provide for better fisheries regulation. It is recommended that simulation studies similar to those described in this paper be performed prior to the introduction of the extensive data collection schemes required for assessments that include cannibalism or multispecies interactions.

Key words: cannibalism, hake, Schaefer model, management, population modeling, Monte Carlo simulation.

Received 1 December 1992; accepted 17 August 1993.

A. E. Punt, and R. Hilborn, Fisheries Research Institute, University of Washington, Seattle, Washington 98195, USA.

## Introduction

Most of the world's fisheries are currently managed on the basis of single-species assessments that do not consider cannibalism, predation, or environmental variability in any way except to treat these processes as random noise. A major trend in fisheries research is to attempt to model these processes, and some management agencies have embarked on major data collection programs to provide a basis for assessments that explicitly consider these processes. By far the most ambitious projects have been ICES's multispecies VPA (e.g. Anon., 1986, 1989; Pope and Knight, 1982) and the Norwegian MULTSPEC model (e.g. Bogstad *et al.*, 1992). However,

many other fisheries agencies now have some commitment to try explicitly to include variables describing these processes.

Two basic approaches have emerged, first are studies concentrating on cannibalism and predation, which attempt to estimate numbers-at-age for several species by utilizing stomach content data in order explicitly to consider how much each species/age eat of another (e.g. Leonart *et al.*, 1985; Anon., 1986, 1989; Punt, 1992). The second group of studies concentrate on understanding the physical and biological determinants of recruitment (e.g. Peterman and Bradford, 1987; Shannon *et al.*, 1988; Frank *et al.*, 1990). This second type of research has been criticized by Walters and Collie (1988) who

argue that the benefits of being able to predict recruitment are often not particularly high, and that the implementation of feedback-control harvesting strategies may be a more effective, and less expensive, method of managing in the face of recruitment variation.

The models used in most fisheries assessments are so simple, and ignore so much biology, that it is quite natural to expect that adding cannibalism, predation, or environmental determinants of recruitment will provide better prediction and will hence lead to improved resource utilization. However, this has not been demonstrated, and indeed there is a substantial body of literature that shows that very simple models generally provide better prediction than more realistic models (O'Neil, 1973; Ludwig and Walters, 1985; Linhart and Zucchini, 1986; Walters, 1986; Punt, 1988).

The purpose of this paper is to explore the benefits of considering cannibalism in stock assessments. As an example, the assessments of the stocks of Cape hake (*Merluccius capensis* Castelnau and *M. paradoxus* Franca) off southern Africa are used; stocks for which it has been argued that cannibalism should be included when performing stock assessments (e.g. Leonart *et al.*, 1985; Gasyukov and Dorovskikh, 1988). All of the analyses conducted apply to the stock off northern Namibia. However, because of the similar catch trajectories and biology for the various stocks of hake off southern Africa, the results are almost certain to be insensitive to this particular selection.

The first step is to develop a variant of the Schaefer model that explicitly includes two age groups and cannibalism of older fish on younger fish, and to fit it to the actual catch-and-effort data for the northern Namibian hake population. The model considered is non-age-structured so that the traditional Schaefer model (Schaefer, 1954, 1957) is a submodel of it. The model utilized in this paper is deliberately simpler than the models which might be applied to actual field data for the resource under consideration (e.g. Leonart *et al.*, 1985; Anon., 1986, 1989; Gasyukov and Dorovskikh, 1988; Punt, 1992) so that some generic conclusions regarding modeling cannibalism use can be drawn. Inevitably, the model will fail to capture some of the peculiarities of the actual situation so that the numerical results obtained from a more complex model might be slightly different from those obtained using the age-aggregated model. However, utilizing a more complex model would complicate the interpretation of the results substantially, to the extent that generic conclusions might not be as clear as is the case when using a simple model.

The next stage is to test the ability of cannibalistic and non-cannibalistic model-estimation procedures to estimate parameter values from simulated data with differing levels of known cannibalism. Finally, the

performance of these model-estimation procedures under feedback-control management is examined.

## A "cannibalistic" model-estimation procedure

Gut content studies conducted in the south-east Atlantic suggest that the major predators of juvenile Cape hake are adult Cape hake (mainly the shallow-water species *Merluccius capensis* Castelnau) (Chlapowski, 1977; Botha, 1980; Prenske, 1980; Bergh, 1986; Andronov, 1987; Payne *et al.*, 1987; Roel and MacPherson, 1988; Punt *et al.*, 1992). Therefore, for simplicity, only the time-dependence of the predation mortality due to hake has been modeled explicitly – the natural mortality due to other causes has been assumed to be time-invariant. A further assumption which has been made to construct a simple model of Cape hake dynamics is that the mature and recruited components of the population and that component which feeds on juvenile hake are all the same. This is not a completely unreasonable assumption because the age-at-50% maturity is about 4 years (Botha, 1986; Punt and Leslie, 1991), hake recruit to the fishery between ages 2 and 3 (Punt, 1988), and start eating large quantities of juvenile hake at age 4 (Botha, 1980). The implication of these assumptions is that the dynamics of the Cape hake resource can be modeled by the dynamics of its two interacting components (adults and juveniles):

$$B_{i+1} = B_i - \Omega_1 B_i + \phi J_{i+1} - \Gamma_i B_i \quad (1)$$

$$J_{i+1} = J_i - \Omega_2 J_i - \phi J_i + g(B_i) - \psi J_i B_i / K$$

$$(C/E)_i = q \frac{B_i + B_{i+1}}{2} e^{v_i}, v_i \text{ from } N(0, \sigma^2). \quad (2)$$

where  $B_i$  is the adult (exploitable/mature) biomass at the start of year  $i$ ;  $J_i$  is the juvenile biomass at the start of year  $i$ ;  $g(B)$  is the contribution of births to the population, as a function of adult biomass,  $g(B) = rB(1 - B/K^*)$ .  $(C/E)_i$  is the CPUE for year  $i$ ;  $\Gamma_i$  is the fraction of the adult biomass caught in year  $i$  ( $\Gamma_i B_i = C_i$  – the catch in year  $i$ );  $\Omega_1$  is the net change of the adult biomass due to growth and mortality from natural causes;  $\Omega_2$  is the net change of the juvenile biomass due to growth and all causes of natural mortality *except predation by hake*;  $K$  is the average pre-exploitation population size;  $r, K^*$  are the parameters of the birth function.  $K^*$  should not be confused with  $K$ .  $K$  and  $K^*$  are only equal when natural mortality is not explicitly modeled;  $q$  is the catchability coefficient;  $\phi$  is the fraction of the juvenile biomass which recruits each year;  $\psi$  is the coefficient of cannibalism; and  $\sigma^2$  is the variance of the (multiplicative) observation error.

The model incorporates the effects of basal natural mortality by means of the parameters  $\Omega_1$  and  $\Omega_2$ . The time-lag to recruitment is altered by varying the value of the parameter  $\phi$ , and the extent of cannibalism is varied

by changing the value of the parameter  $\psi$ . Cannibalism is scaled by the average pre-exploitation biomass ( $K$ ) so that the parameter  $\psi$  has a natural interpretation – the fraction of the juvenile biomass which dies due to cannibalism when the resource is at its pre-exploitation level. In order for the size of the juvenile component of the population always to be non-negative, the parameters  $\Omega_2$ ,  $\phi$ , and  $\psi$  must satisfy the constraint  $\Omega_2 + \phi + \psi \leq 1$ . Note that Equation (1) does not include a term which allows for the beneficial effect of the consumption of juveniles on the size of the adult population because Cape hake are opportunistic feeders (Payne *et al.*, 1987; Punt *et al.*, 1992) – in years in which the diet of adult hake consists of large amounts of juvenile hake, there is a compensating reduction in the quantities of other species eaten so that the daily ration of adult hake is roughly independent of the abundance of prey species.

The relationship between the model parameters and the average pre-exploitation biomass is given by:

$$K^* = \frac{rK\phi}{r\phi - \Omega_1(\psi + \phi + \Omega_2)} \quad (3)$$

[i.e.  $K^*$  equals  $K$  when  $\Omega_1 = 0$ ].

The effective surplus production [the equilibrium catch for various values of  $B$ ] is given by:

$$C(B) = -\Omega_1 B + \frac{rB(1 - B/K^*)}{1 + \Omega_2/\phi + \psi B/(K\phi)} \quad (4)$$

A special case of Model (1) [ $\psi = \Omega_1 = \Omega_2 = 0$ ;  $\phi = 1$ ] is the standard non-cannibalistic model traditionally applied in the management of the Cape hake resource off southern Africa (e.g. Butterworth and Andrew, 1984).

In order to fit Model (1) to a time series of catch and catch rate data, the following sum of squares function is minimized:

$$SS = \sum_{i=1}^n [\ln(C/E)_i - \ln(\hat{C}/\hat{E})_i]^2 \quad (5)$$

where  $(\hat{C}/\hat{E})_i = \hat{q}(\hat{B}_i + \hat{B}_{i+1})/2$ .

As the number of estimable parameters is nine ( $\Omega_1$ ,  $\Omega_2$ ,  $\phi$ ,  $\psi$ ,  $r$ ,  $K^*$ ,  $q$ ,  $B_{1965}$ , and  $\sigma^2$ ), it is infeasible (due to precision considerations) to attempt to estimate all of them from a time series of catch and catch rate data. Hence, when performing fits, four of the parameters ( $\Omega_1$ ,  $\Omega_2$ ,  $\phi$ , and  $\psi$ ) have been fixed. Further, the catches of hake off northern Namibia prior to 1965 were relatively small (less than 10 000 tons) (Punt, 1988), so it is reasonable to assume that this stock was at its average pre-exploitation level at that time (i.e.  $B_{1965} = K$ ). Only two parameters ( $r$  and  $K^*$ ) are included in the non-linear search because the other two ( $q$  and  $\sigma^2$ ) can be obtained analytically (Cooke, 1983;

Table 1. Catch and catch rate data for the Cape hake resource off northern Namibia. Units: catches – tons; catch rate – tons per OTB-7 standardized hour. Source: ICSEAF statistical bulletins.

| Year | Catch   | CPUE | Year | Catch   | CPUE |
|------|---------|------|------|---------|------|
| 1965 | 93 510  | 1.78 | 1977 | 276 901 | 0.49 |
| 1966 | 212 444 | 1.31 | 1978 | 254 251 | 0.43 |
| 1967 | 195 032 | 0.91 | 1979 | 170 006 | 0.40 |
| 1968 | 382 712 | 0.96 | 1980 | 97 181  | 0.45 |
| 1969 | 320 430 | 0.88 | 1981 | 90 523  | 0.55 |
| 1970 | 402 467 | 0.90 | 1982 | 176 438 | 0.53 |
| 1971 | 365 557 | 0.87 | 1983 | 216 063 | 0.58 |
| 1972 | 606 084 | 0.72 | 1984 | 228 529 | 0.64 |
| 1973 | 377 642 | 0.57 | 1985 | 212 151 | 0.66 |
| 1974 | 318 836 | 0.45 | 1986 | 230 873 | 0.65 |
| 1975 | 309 374 | 0.42 | 1987 | 136 412 | 0.63 |
| 1976 | 389 020 | 0.42 |      |         |      |

Punt, 1988). The current replacement yield (RY) is estimated by the surplus production during year  $n+1$  [given by Equation (4)].

## Results

### Fits to actual data

Model (1) was fitted to the actual catch and catch rate data for the Cape hake resource off northern Namibia (Table 1) for various values of the parameters  $\phi$ ,  $\psi$ ,  $\Omega_1$ , and  $\Omega_2$  which satisfy the constraint that  $\phi + \psi + \Omega_2 \leq 1$ . For all of the calculations in this paper,  $\Omega_2$  has for simplicity been taken to be equal to  $\Omega_1$  and these parameters are henceforth referred to as  $\Omega$ . The estimates of the parameters  $r$  and  $K$  as well as the estimates of the management variables  $B_{1988}/K$  – the current depletion,  $MSY$  – the maximum sustainable yield,  $RY$  – the current replacement yield and  $B_{MSY}/K$  – the ratio of the adult biomass at which  $MSY$  is achieved to the average pre-exploitation biomass, are given in Table 2 for 34 of the variants considered. The results for  $\phi < 0.2$  have been omitted from Table 2 because they correspond to rather poor fits to the observed data. The set of results in Table 2 marked with an asterisk correspond to the fit of the traditional non-cannibalistic Schaefer model-estimation procedure (i.e.  $\phi = 1$ ,  $\psi = \Omega_1 = \Omega_2 = 0$ ).

The results reported in Table 2 suggest that the assessment of the Cape hake resource off northern Namibia is not particularly sensitive to the selection of values for the cannibalism parameters. There are, however, some features in Table 2 which are worth noting.

The value of the parameter “ $r$ ” (conventionally the intrinsic growth rate parameter) is highly dependent on the values of  $\phi$ ,  $\psi$ , and  $\Omega$ . The value of  $r$  increases as the values of the parameters  $\psi$  and  $\Omega$  are increased, and as the value of the parameter  $\phi$  is decreased (if  $\Omega > 0$ ). The trend in  $r$  with the former two parameters is a result of

Table 2. Summary of the results of the application of 34 variants of the "cannibalistic" model-estimation procedure to the catch-and-effort data for the Cape hake resource off northern Namibia. RY refers to the sustainable yield during 1988. The row marked by an asterisk corresponds to the fit of the traditional non-cannibalistic Schaefer model while the column SS refers to the value of Equation (5) corresponding to the results provided (multiplied by 1000 for presentational ease). Units for MSY and RY are '000 t.

| $\phi$ | $\psi$ | $\Omega$ | SS  | $r$   | K    | $B_{1988}/K$ | MSY   | $B_{MSY}/K$ | RY    |
|--------|--------|----------|-----|-------|------|--------------|-------|-------------|-------|
| 0.200  | 0.000  | 0.000    | 306 | 0.319 | 3944 | 0.548        | 315.0 | 0.500       | 312.1 |
| 0.400  | 0.000  | 0.000    | 298 | 0.332 | 3352 | 0.526        | 278.3 | 0.500       | 277.6 |
| 0.600  | 0.000  | 0.000    | 295 | 0.356 | 3055 | 0.528        | 272.1 | 0.500       | 271.3 |
| 0.800  | 0.000  | 0.000    | 294 | 0.372 | 2906 | 0.534        | 270.0 | 0.500       | 268.8 |
| *1.000 | 0.000  | 0.000    | 295 | 0.379 | 2836 | 0.539        | 268.6 | 0.500       | 266.9 |
| 0.200  | 0.200  | 0.000    | 301 | 0.426 | 3815 | 0.534        | 279.0 | 0.414       | 263.8 |
| 0.400  | 0.200  | 0.000    | 296 | 0.392 | 3348 | 0.522        | 265.2 | 0.449       | 259.7 |
| 0.600  | 0.200  | 0.000    | 293 | 0.395 | 3103 | 0.526        | 263.8 | 0.464       | 259.8 |
| 0.800  | 0.200  | 0.000    | 293 | 0.398 | 2974 | 0.531        | 263.7 | 0.472       | 260.1 |
| 0.200  | 0.400  | 0.000    | 299 | 0.539 | 3724 | 0.524        | 268.9 | 0.366       | 244.4 |
| 0.400  | 0.400  | 0.000    | 294 | 0.452 | 3349 | 0.519        | 259.7 | 0.414       | 248.8 |
| 0.600  | 0.400  | 0.000    | 292 | 0.433 | 3145 | 0.523        | 259.2 | 0.436       | 251.7 |
| 0.200  | 0.600  | 0.000    | 298 | 0.654 | 3663 | 0.516        | 266.1 | 0.333       | 234.6 |
| 0.400  | 0.600  | 0.000    | 294 | 0.511 | 3355 | 0.515        | 257.3 | 0.387       | 241.5 |
| 0.200  | 0.800  | 0.000    | 298 | 0.769 | 3621 | 0.510        | 266.0 | 0.309       | 229.0 |
| 0.200  | 0.000  | 0.200    | 319 | 1.314 | 2277 | 0.487        | 260.2 | 0.500       | 260.1 |
| 0.400  | 0.000  | 0.200    | 300 | 0.999 | 2274 | 0.512        | 265.0 | 0.500       | 264.8 |
| 0.600  | 0.000  | 0.200    | 296 | 0.881 | 2310 | 0.527        | 266.0 | 0.500       | 265.2 |
| 0.800  | 0.000  | 0.200    | 296 | 0.815 | 2353 | 0.536        | 265.9 | 0.500       | 264.5 |
| 0.200  | 0.200  | 0.200    | 312 | 1.427 | 2428 | 0.492        | 251.9 | 0.449       | 250.0 |
| 0.400  | 0.200  | 0.200    | 299 | 1.045 | 2411 | 0.512        | 257.9 | 0.464       | 255.6 |
| 0.600  | 0.200  | 0.200    | 296 | 0.909 | 2426 | 0.524        | 260.4 | 0.472       | 257.6 |
| 0.200  | 0.400  | 0.200    | 309 | 1.540 | 2549 | 0.495        | 249.2 | 0.414       | 242.9 |
| 0.400  | 0.400  | 0.200    | 299 | 1.094 | 2521 | 0.511        | 254.3 | 0.436       | 248.7 |
| 0.200  | 0.600  | 0.200    | 307 | 1.654 | 2644 | 0.495        | 248.8 | 0.387       | 237.8 |
| 0.200  | 0.000  | 0.400    | 314 | 2.931 | 1810 | 0.507        | 261.1 | 0.500       | 261.0 |
| 0.400  | 0.000  | 0.400    | 303 | 1.898 | 1918 | 0.525        | 263.3 | 0.500       | 262.7 |
| 0.600  | 0.000  | 0.400    | 301 | 1.542 | 2012 | 0.536        | 264.0 | 0.500       | 262.7 |
| 0.200  | 0.200  | 0.400    | 312 | 2.998 | 1970 | 0.507        | 254.4 | 0.464       | 252.5 |
| 0.400  | 0.200  | 0.400    | 302 | 1.928 | 2052 | 0.522        | 257.9 | 0.472       | 255.4 |
| 0.200  | 0.400  | 0.400    | 311 | 3.079 | 2103 | 0.505        | 251.0 | 0.436       | 246.3 |
| 0.200  | 0.000  | 0.600    | 312 | 4.951 | 1642 | 0.527        | 261.7 | 0.500       | 260.9 |
| 0.400  | 0.000  | 0.600    | 307 | 2.992 | 1761 | 0.539        | 262.8 | 0.500       | 261.2 |
| 0.200  | 0.200  | 0.600    | 310 | 4.990 | 1777 | 0.523        | 256.4 | 0.472       | 253.8 |

the model compensating for increased natural mortality by increasing the rate of reproduction. The dependence of  $r$  on the value of  $\phi$  is related to a need to compensate for longer time-lags in the model. Both MSY and K decrease as  $\phi$ ,  $\Omega$ , or  $\psi$  are increased. The sensitivity of MSY to the values of the cannibalism parameters is less than that of K, with the consequence that MSYR (the ratio of MSY to the biomass at which this yield is achieved, i.e.  $MSY/B_{MSY}$ ) is an increasing function of  $\phi$ ,  $\Omega$ , and  $\psi$ . For example, the MSYR for the ( $\phi=0.2$ ;  $\psi=0.2$ ;  $\Omega=0.6$ ) model is almost double that for the non-cannibalistic model ( $\phi=1$ ;  $\psi=0$ ;  $\Omega=0$ ).

Another feature of Table 2 is that if the value of  $\psi$  is larger than zero, the ratio  $B_{MSY}/K$  is less than 0.5 – when  $\psi=0$ ,  $B_{MSY}/K$  is the traditional Schaefer model value of 0.5. The lowest value of this ratio in Table 2 is 0.309, which occurs when the cannibalism parameters are set to  $\phi=0.2$ ;  $\psi=0.8$ ;  $\Omega=0$ . The dependence of  $B_{MSY}/K$  on the cannibalism parameters is due to higher

levels of natural mortality at higher biomass levels, resulting in the trade-off between natural mortality and reproduction being optimized at a lower fraction of the average pre-exploitation biomass. Figure 1 provides the estimates of the surplus production function for four combinations of the cannibalism parameters.

The estimates of current depletion ( $B_{1988}/K$ ) are not very sensitive to the values of the cannibalism parameters (the range of estimates of this quantity in Table 2 is 0.487–0.548). Nevertheless, some trends in the estimates of  $B_{1988}/K$  with the values of the cannibalism parameters are apparent. For example, if  $\psi>0$ , the estimate of  $B_{1988}/K$  decreases as  $\psi$  is increased and when  $\phi>0.2$  and  $\Omega>0.2$ ,  $B_{1988}/K$  increases as  $\phi$  is increased.

There is little possibility of selecting amongst the various models in Table 2 on the basis of their fits to the observed data. This is because the values of SS [see Equation (5)] are relatively insensitive to the values assigned to the cannibalism parameters (see the fits of

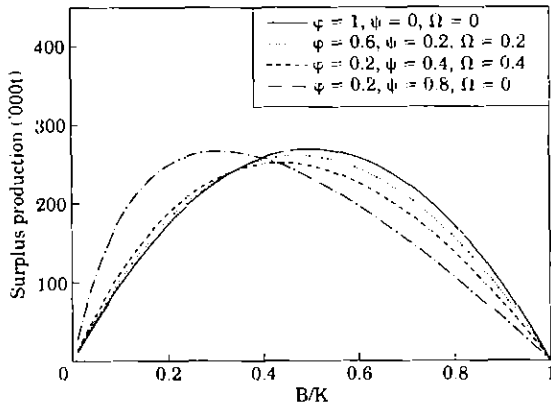

Figure 1. Estimates of the surplus production function for the Cape hake resource off northern Namibia provided by four alternative model-estimation procedures.

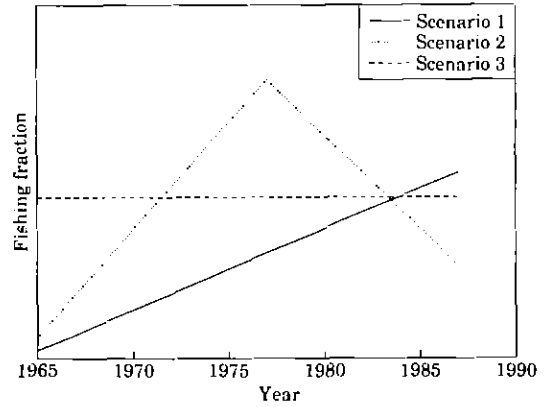

Figure 3. The three alternative fishing fraction ( $\Gamma_t$ ) time series considered in the simulation exercises.

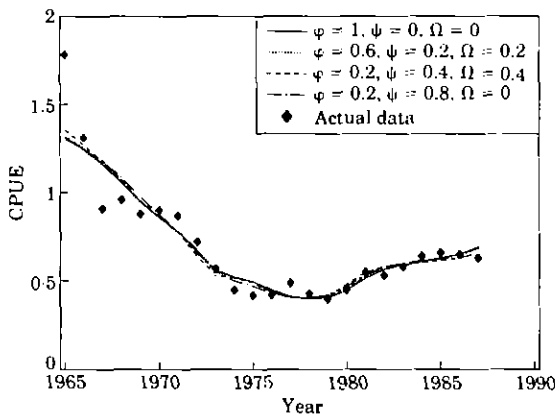

Figure 2. CPUE time series obtained from the fits of four variants of the cannibalistic model.

four of the models in Figure 2). This suggests that, were a model-estimation procedure to be used to estimate the cannibalism parameters (i.e.  $\phi$ ,  $\psi$ , and  $\Omega$ ) from catch and catch-rate data alone, such estimates would, in all likelihood, be very imprecisely determined. In order to obtain values for these parameters, therefore, it is necessary to collect additional data. Note, however, that some management quantities such as  $B_{1988}/K$  may be reasonably well determined, even though this is unlikely for the estimates of  $\phi$ ,  $\psi$ , and  $\Omega$ .

Comparison of the results of the non-cannibalism model-estimation procedure (the row in Table 2 marked by an asterisk) with the results of the other model-estimation procedures suggests that the estimates of  $B_{1988}/K$ , MSY, and RY provided by this procedure are generally more optimistic than the corresponding "cannibalistic" estimates. This is of some concern because of the possible implications related to accidental overexploitation. This will be examined further below.

### Estimation ability – a simulation exercise

The results of Table 2 suggest that the estimates provided by the non-cannibalism model-estimation procedure may overestimate MSY as well as the current replacement yield if the true situation involves cannibalism effects. This could, in turn, lead to overestimation of total allowable catches (TACs) and hence to biological overexploitation.

In order to investigate this problem further, a simulation exercise has been carried out. Four sets of cannibalism parameter values ( $\phi=1; \psi=0; \Omega=0$ ,  $\phi=0.6; \psi=0.2; \Omega=0.2$ ,  $\phi=0.2; \psi=0.4; \Omega=0.4$ , and  $\phi=0.2; \psi=0.8; \Omega=0.0$ ), which may be representative of the dynamics of the Cape hake resource off northern Namibia, were used to generate 100 artificial catch and catch-rate data sets according to Equations (1) and (2). Using the nomenclature of Linhart and Zucchini (1986), the combination of Equations (1) and (2) and a set of cannibalism parameter values will be referred to as an operating model. The first three of these four sets of values were selected because they capture the range from no cannibalism to substantial cannibalism. The fourth set was selected because it corresponds to the lowest  $B_{MSY}/K$  ratio, and hence to the surplus production function most different from that of the traditional Schaefer model (see Fig. 1). In order to mimic the northern Namibian hake population, the value of  $\sigma$  [see Equation (2)] used in these calculations was 0.12 and each data series contained 23 data points. The selection of  $\sigma=0.12$  is based on the fit of the traditional Schaefer model to the CPUE data for the hake stock considered. Three alternative historic fishing fraction ( $\Gamma_t$ ) trajectories are considered (see Fig. 3). All three of these series project a value of  $B_{1988}/K$  roughly equal to 0.52. They differ in their level of data contrast. Of these three fishing fraction time-series, that in which the fishing fraction increases and then decreases mimics most closely the actual situation for the hake stocks off southern Africa.

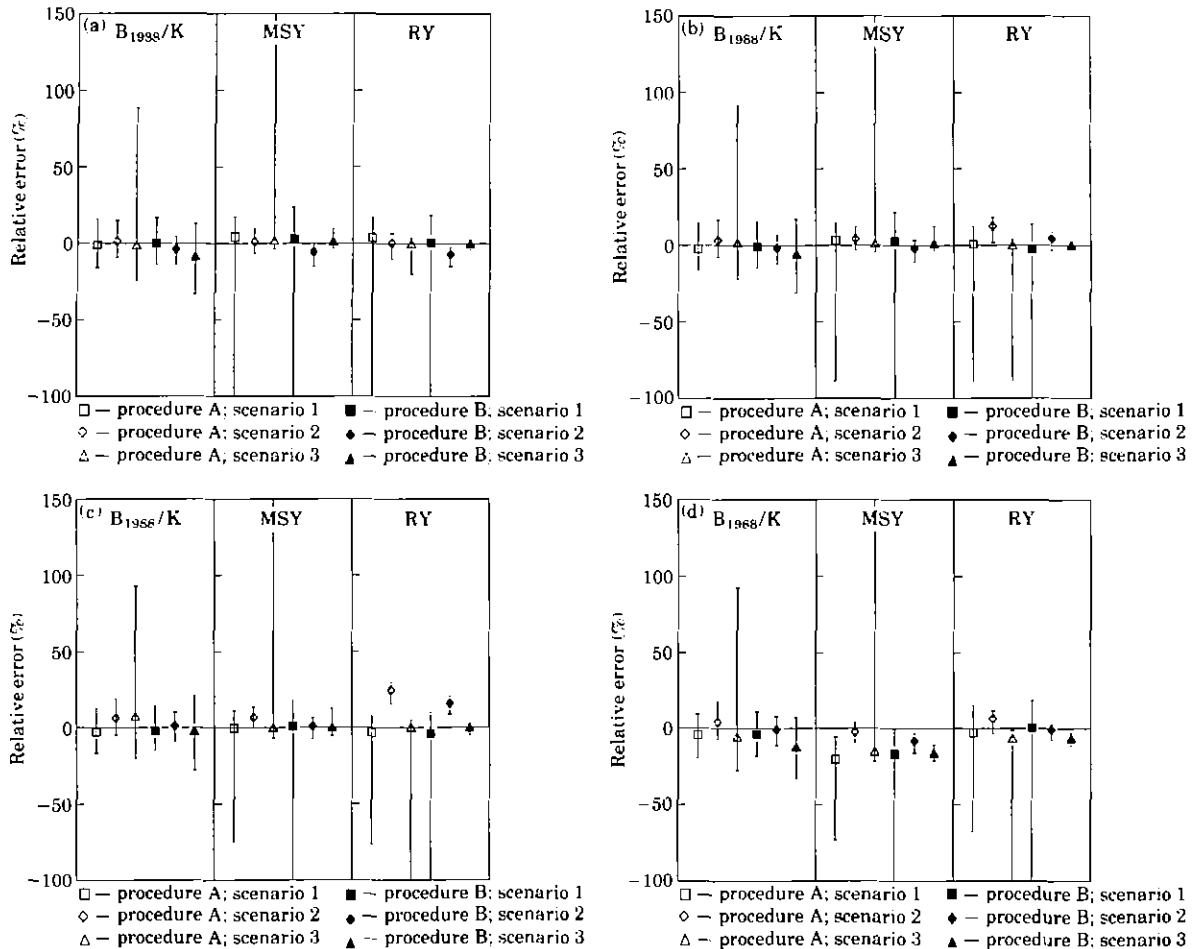

Figure 4. Comparison of the estimation performance of non-cannibalistic (procedure A) and cannibalistic (procedure B) model-estimation procedures for each of the three alternative fishing fraction time series and for each of four alternative models of Cape hake dynamics: (a)  $\phi=1$ ,  $\psi=0$ ,  $\Omega=0$ ; (b)  $\phi=0.6$ ,  $\psi=0.2$ ,  $\Omega=0.2$ ; (c)  $\phi=0.2$ ,  $\psi=0.4$ ,  $\Omega=0.4$ ; (d)  $\phi=0.2$ ,  $\psi=0.8$ ,  $\Omega=0$ . Medians and 90% intervals of the relative error distributions of  $B_{1988}/K$ , MSY, and RY are shown.

Figure 4 contains plots of medians and 90% intervals for the relative errors of three management quantities:  $B_{1988}/K$ , MSY, and RY for two model-estimation procedures: procedure A, the traditional Schaefer model, and procedure B, the  $\phi=0.2$ ;  $\psi=0.4$ ;  $\Omega=0.4$  model, for each of the three fishing fraction trajectories (scenarios 1–3). Results are shown in Figure 4 for each of the four operating models mentioned above. Procedure B was selected for comparison because it is one of the “most cannibalistic” models considered. Note that the “r” and “K” values used in the generation process are those estimates obtained by fitting the model concerned to the actual catch-and-effort data for the Cape hake resource of northern Namibia (Table 2). The simulations are thus conditioned on a biology similar to that of Cape hake.

When the non-cannibalism model (i.e.  $\phi=1$ ;  $\psi=0$ ;  $\Omega=0$ ) is used to generate the artificial data sets (Fig. 4a),

the non-cannibalism model-estimation procedure (procedure A) provides estimates of the three management quantities which are close to their true values, at least on average – the absolute value of the largest median relative error for procedure A in Figure 4a is less than 5%. Although the median relative errors are close to zero, in some cases the distributions of relative error are wide because of the effects of outliers. One consequence of this is that the estimates of some management quantities are biased. For example, the estimates of  $B_{1988}/K$  and MSY for scenario 3 (constant fishing fraction) are positively biased, while those of MSY and RY are negatively biased for scenario 1 (linearly increasing fishing fraction).

Of the three management quantities considered,  $B_{1988}/K$  is estimated with the greatest precision. This is not very surprising; the CPUE data provide information on this quantity directly. The poor precision of  $B_{1988}/K$

evident for scenario 3 is of some concern. As might have been expected, the results for scenario 2 are the least variable of the three scenarios considered. This is because the fishing fraction time-series for this scenario (increasing then decreasing) generates more data contrast than those for the other two scenarios.

The results for the cannibalistic estimator (procedure B) are qualitatively similar to those of procedure A. The estimates provided by procedure B are, however, somewhat less variable than those provided by procedure A (particularly for scenario 3), while the median relative errors differ from zero to a slightly larger extent (the absolute value of the largest median relative error for procedure B in Figure 4a is 9%). In general, the relative errors are more negative for procedure B than for procedure A (see, for example, the estimates of RY for scenario 2). This behaviour was to have been expected given that procedure B resulted in more pessimistic estimates than procedure A when it was applied to the actual data for the hake resource off northern Namibia (see Table 2).

When the artificial data sets are generated by models which incorporate cannibalistic dynamics (Fig. 4b-d), the results are qualitatively similar to those for the non-cannibalistic operating model (Fig. 4a). There are, however, some features of these figures worth noting. For example, both procedures A and B are more likely to provide overestimates of  $B_{1988}/K$  and RY for scenario 2 when the operating models used for Figure 4b and c represent the true situation than is the case for the operating model of Figure 4a – the extent of increase in the chance of overestimation increases with the extent of cannibalism. On the other hand, the estimates for scenario 1 are slightly more likely to be underestimates than is the case when the model used to generate the data does not incorporate cannibalism.

It is unclear exactly why the changes in performance occur when different operating models are used to generate the artificial data sets. Undoubtedly, the increased probability of overestimation evident in Figure 4b and c is related to the fact that the cannibalistic model-estimation procedures generally provide less optimistic appraisals than the non-cannibalistic model-estimation procedure. However, there is also some interaction between the values of the cannibalism parameters, the fishing fraction time series, and the estimator which complicates assessment of the causes of changes in performance.

### Performance under feedback control

Although most of the biases in Figure 4 are not large, they are nevertheless of some concern. The presence of occasional outlying estimates (particularly of MSY) could lead to accidental overexploitation if TACs were based on them. The results of Figure 4 thus suggest that

it is possible for a management procedure based on the non-cannibalism model to perform poorly if the real situation incorporated cannibalism effects and that some knowledge of the extent of cannibalism may serve to prevent this. This question is examined by means of a further simulation exercise.

Each of the four operating models considered in the previous section were used to generate 100 artificial sets of historic catch and catch-rate data. The two model-estimation procedures, in combination with the  $f_{MSY}$  harvesting strategy, were then used to manage these simulated resources for a further 10 years. This type of simulation exercise was first considered for management procedures based on the Schaefer model by Hilborn (1979) and is similar to the extensive simulation exercise used by the Scientific Committee of the International Whaling Commission (e.g. IWC, 1989, 1992) to select a revised management procedure for baleen whales.

The  $f_{MSY}$  strategy seeks to stabilize the biomass of a resource at  $B_{MSY}$  by setting TACs according to the formula:

$$TAC_{n+1} = (\hat{B}_{n+1} / \hat{B}_{MSY}) M\hat{S}Y, \quad (6)$$

where  $TAC_{n+1}$  is the  $f_{MSY}$  strategy TAC for year  $n+1$  based on data until year  $n$ ;  $\hat{B}_{n+1}$  is the model estimate of the adult biomass at the start of year  $n+1$ ;  $\hat{B}_{MSY}$  is the model estimate of the adult biomass at which MSY is achieved; and  $M\hat{S}Y$  is the model estimate of the maximum sustainable yield.

Note that the use of the  $f_{MSY}$  harvesting strategy in this simulation exercise does not imply that it is a strategy which is appropriate for the management of the Cape hake resources off southern Africa, but rather that it is a strategy which is easily defined and implemented within simulation trials. Punt (1992) can be consulted for a discussion on appropriate management strategies for these resources.

The three performance attributes which have been selected to measure the performance of each management procedure for each simulation trial are:

1.  $P_r$  – the ratio of the adult biomass at the end of the 10-year simulation period to the pre-exploitation adult biomass ( $K$ ).
2.  $P_{low}$  – the smallest ratio of ( $B_y/K$ ) during the 10-year management period.
3.  $C$  – the average annual catch during the 10-year management period.

The performance of alternative management procedures has been represented by means of plots in Figure 5. These plots show the median and 90% limits of the three performance attributes over the 100 simulation trials. In addition, medians and 90% limits are provided for the relative error of the estimate of MSY at the end of the 10-year management period. The  $P_r$  and  $C$  attributes measure the ability of a procedure to utilize the resource – the  $P_r$  distribution should be compared to

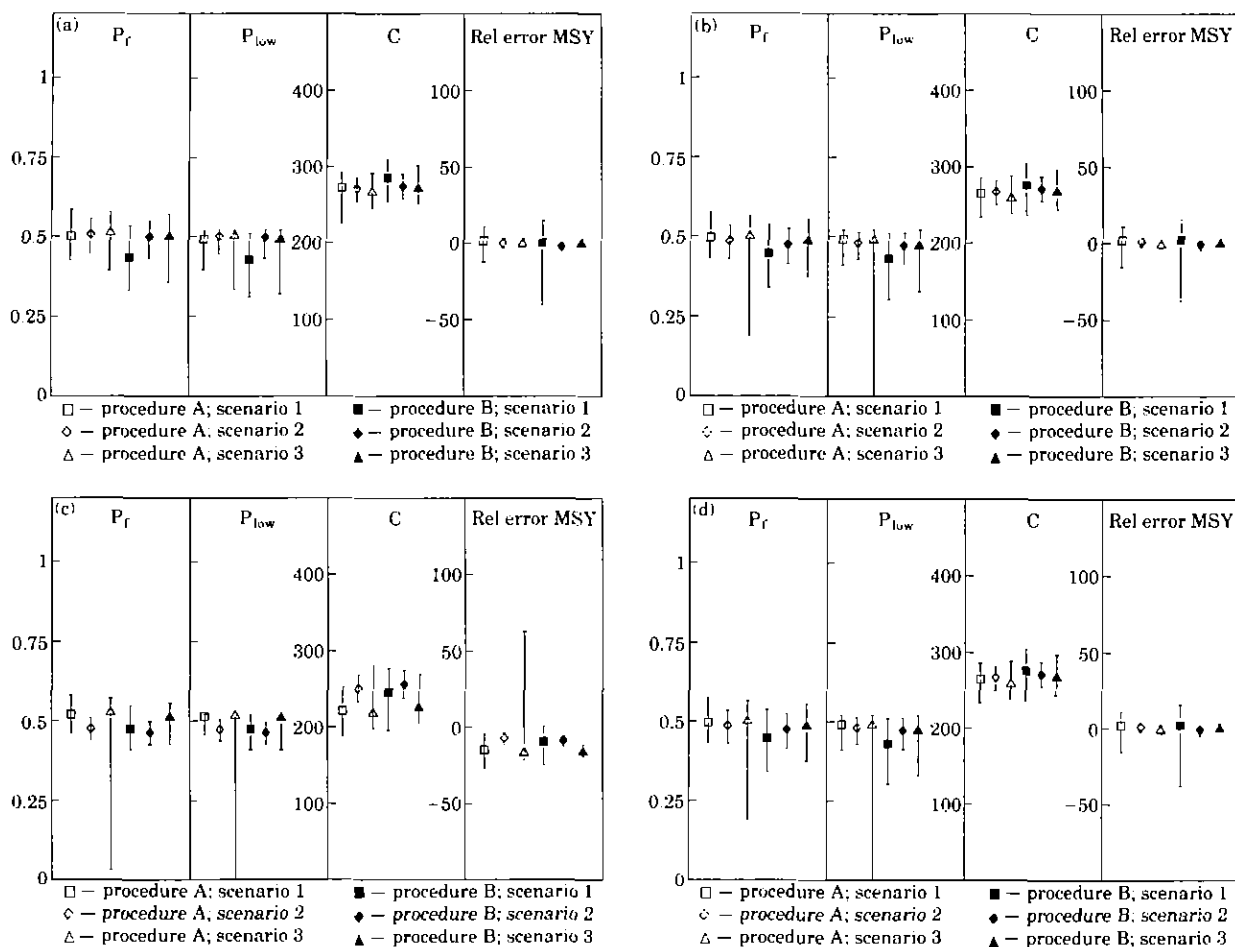

Figure 5. Comparison of the performance of two management procedures for four alternative models of Cape hake dynamics: (a)  $\phi=1$ ,  $\psi=0$ ,  $\Omega=0$ ; (b)  $\phi=0.6$ ,  $\psi=0.2$ ,  $\Omega=0.2$ ; (c)  $\phi=0.2$ ,  $\psi=0.4$ ,  $\Omega=0.4$ . (d)  $\phi=0.2$ ,  $\psi=0.8$ ,  $\Omega=0$ . Each plot shows the results for three alternative fishing fraction time series. The results for a trial are summarized by the median and 90% limits of the  $P_f$ ,  $P_{low}$ , and  $C$  distributions (see text for definitions), as well as by the median and 90% limits of the relative error distribution of the estimate of  $MSY$  at the end of the 10-year management period.

the  $B_{MSY}/K$  of the operating model. The  $P_{low}$  attribute will be used to assess the risk associated with a management procedure. The relative error distribution for  $MSY$  is provided in order to determine the ability of a procedure to “learn” the true value of this parameter during the 10-year management period, and should be compared to the relative error distributions for this quantity in Figure 4.

For the non-cannibalistic operating model (Fig. 5a), the biomass is not left very far from  $B_{MSY}$  at the end of the 10-year management period. The non-cannibalistic management procedure (procedure A) with its  $B_{MSY}/K$  ratio of 0.5 tends to leave the biomass at a slightly higher level than the cannibalistic management procedure (procedure B) with its  $B_{MSY}/K$  ratio of 0.44. As a consequence of this, procedure B achieves higher average catches. The medians of the lowest depletion

distributions are not much lower than the medians of the final depletion distributions (maximum 2%), and in no case does the median lowest depletion drop below 0.4. These results thus suggest that within the 10-year management period, both management procedures are able to manage the resource satisfactorily (at least in some average sense).

When the operating model incorporates cannibalism (Fig. 5b–d), the performance of procedure A in terms of preventing overexploitation is very poor for scenario 3 (constant fishing fraction), even though the medians of the three performance attributes are not very different from their Figure 5a values even for this scenario. In more than 5% of the trials for scenario 3, procedure A drives the population to extinction in the first year because of an outlying estimate of  $MSY$ . As procedure B achieves similar values to procedure A for the  $P_f$  and  $C$



performance attributes for this scenario, it is clearly superior to procedure A in this case. Note that the poor performance of procedure A may have been avoided had a restriction been placed on the extent to which the catch may vary from one year to the next. However, examination of alternative harvesting strategies is beyond the scope of this paper.

As the extent of cannibalism is increased, the actual (i.e. operating model)  $B_{MSY}/K$  decreases. However, the  $P_r$  distributions are almost independent of the values of the cannibalism parameters, except, of course, for the case of scenario 3. As a result, when the operating model incorporates cannibalism, overexploitation (i.e.  $P_r < B_{MSY}/K$ ) is less likely. This increased resilience to overexploitation is also noted by Punt (1992).

The distribution of the relative errors of the estimate of MSY are much narrower after 10 years of management for the two operating models with the lowest extent of cannibalism. This suggests that the use of the  $f_{MSY}$  strategy over this period may lead to some notable increases in data contrast and hence in the ability to estimate the intrinsic growth rate parameter – a parameter which is often difficult to estimate using only a declining CPUE series (Hilborn, 1979). Not surprisingly, the estimate of MSY for scenario 2 is the best determined.

## Discussion

The results reported above suggest that both of the model-estimation procedures considered are robust to the cannibalism behaviors investigated if a medium-term time horizon is considered and if the data contain a reasonable amount of contrast. At first this may appear surprising as the non-cannibalism and cannibalism model-estimation procedures are structurally different. However, when the cannibalism model is fitted to actual data, the fits are not very different from those of the non-cannibalism model (see Fig. 2). The data thus forced the simulation studies to consider only parameterizations which turned out to be dynamically similar to those of the non-cannibalism model. The above suggests that, if simulation studies are performed to test the ability of management procedures for a specific stock, the operating model should be parameterized as much as possible using the results of fits to real data. If this is not the case, spurious and unfortunate conclusions can be reached.

The results reported above have some bearing on the management of the hake resources off southern Africa as well as the direction in which future research effort should take. The results for scenario 2 suggest that the non-cannibalism procedure is robust to the true dynamics of the scenarios considered even for a relatively wide range of cannibalism-related parameter values and that the performance of a cannibalistic

procedure is virtually identical to that of the non-cannibalistic procedure. This conclusion is sensitive to the exploitation history. In particular, the cannibalistic procedure performs much more satisfactorily than the non-cannibalistic procedure for the case in which the fishing fraction is constant.

However, as mentioned earlier, the exploitation pattern for the hake resources off southern Africa is similar to scenario 2. Thus, had considerable time and sampling effort been taken to obtain data which could be used to select values for the parameters  $\phi$ ,  $\psi$ , and  $\Omega$ , the sampling effort expended would most likely have been in vain. This is because the non-cannibalism management procedure is likely to perform at least as well as most procedures which incorporate cannibalistic dynamics, at least in the short- to medium-term for scenario 2. This suggests that, for these hake resources, there seems little point in attempting to estimate the values of cannibalism parameters. A similar conclusion was reached by Punt (1992) for the Cape hake stock of the west coast of South Africa.

In a more general context, the results of this paper indicate that prior to the commencement of any large and expensive programs designed to collect stomach data for use in management, it is first necessary to determine whether the extra information that would be gained by using a management procedure that uses this information would lead to improved performance that is more than able to compensate for the associated increases in cost and sampling effort. For example, the results of this paper suggest that had it been likely that the fishing fraction time-series was similar to scenario 3, there would be a rationale for attempting to estimate the values of cannibalism parameters.

It should be noted that the results of this paper do not suggest that all stomach content collection programs should be stopped because they are "useless". Rather, the purpose of regular (and small-scale) data collection programs is to provide sufficient data so that it is possible to conduct analyses such as those in this paper to determine whether a large-scale data collection program (with its associated uncertainties) might lead to improved management. The results of the analyses of this paper suggest that in cases in which the data do not contain much contrast, the benefits of knowing something about cannibalism can lead to improved management. An issue not covered by this paper is whether it is in fact possible to estimate the parameters of a cannibalistic model with reasonable precision. Punt *et al.* (1992) examined the sampling variances associated with the stomach content data for Cape hake collected off the west coast of South Africa (the largest stomach content data collection program of its kind in that region) and found that estimates of consumption by prey species to be very poorly determined. Whether such data could be used to estimate the values of the parameters of a

cannibalistic model precisely is questionable (see Punt, 1992, for further details).

The results presented above relate to short- to medium-term management ability under an  $f_{MSY}$  harvesting strategy. It is possible that the ability to satisfy long-term management goals (such as optimum mesh sizes) might be enhanced by analyses based on models which incorporate cannibalistic dynamics. However, once again, the ability to make the correct decision depends not only on whether the optimum mesh size depends on cannibalistic dynamics (which it probably does), but also on whether the data could ever detect the correct mesh size with reasonable precision.

The extent to which it is possible to generalize the results of this study to multispecies models is unclear. It is possible in principle to perform the type of calculations reported in this paper to determine this. However, multiple-species systems are much more complex than a cannibalistic system and so this problem is beyond the scope of this paper. Nevertheless, the general point that it should not be assumed *a priori* that utilizing a multispecies model will lead to improved management still holds. If a multispecies model is to be applied in a particular case, simulation studies (based on existing data or data collected from a pilot study) should be conducted to assess the likely performance of management based on such a model.

## Acknowledgments

Bill Silvert and an anonymous referee are thanked for their comments on an earlier draft of this paper.

## References

- Andronov, V. N. 1987. Daily feeding rhythm and daily rations of Cape hake *Merluccius capensis* Castelnau in the Namibian area. Collection of Scientific Papers. International Commission for the Southeast Atlantic Fisheries, 14(1): 39-50.
- Anon. 1986. Report of the Ad Hoc Multispecies Assessment Working Group, 13-19 November 1985. ICES CM 1986/Assess 9.
- Anon. 1989. Report of the Multispecies Assessment Working Group, Copenhagen 7-16 June 1989. ICES CM 1989/Assess 20.
- Bergh, M. O. 1986. The value of catch statistics and records of guano harvests for managing certain South African fisheries. Ph.D. thesis. University of Cape Town. 335 pp.
- Bogstad, B., Tjelmeland, S., Tjelta, T., and Ulltang, O. 1992. Description of a multispecies model for the Barents Sea (MULTSPEC) and a study of its sensitivity to assumptions on food preferences and stock sizes of minke whales and harp seals. IWC Document SC/44/O9. 47 pp.
- Botha, L. 1980. The biology of the Cape hakes *Merluccius capensis* cast. and *M. paradoxus* Franca in the Cape of Good Hope area. Ph.D. thesis, University of Stellenbosch. 182 pp.
- Botha, L. 1986. Reproduction, sex ratio and rate of natural mortality of Cape hakes *Merluccius capensis* Cast. and *M. paradoxus* Franca in the Cape of Good Hope area. South African Journal of Marine Science, 4: 23-35.
- Butterworth, D. S., and Andrew, P. A. 1984. Dynamic catch-effort models for the hake stocks in ICSEAF Divisions 1.3 to 2.2. Collection of Scientific Papers. International Commission for the Southeast Atlantic Fisheries, 11(1): 29-58.
- Cooke, J. G. 1983. Estimating catchability coefficients from catch and effort data. Report of the International Whaling Commission, 33: 449-451.
- Frank, K. T., Perry, R. I., and Drinkwater, K. F. 1990. Predicted response of northwest Atlantic invertebrate and fish stocks to CO<sub>2</sub>-induced climate change. Transactions of the American Fisheries Society, 119: 353-365.
- Chlapowski, K. 1977. Food and feeding of hake in southwest African seas. Collection of Scientific Papers. International Commission for the Southeast Atlantic Fisheries, 4: 115-120.
- Gasyukov, P. S., and Dorovskikh, R. S. 1988. On natural mortality in the Cape hake population in ICSEAF Divisions 1.3-1.4. Collection of Scientific Papers. International Commission for the Southeast Atlantic Fisheries, 15(1): 189-200.
- Hilborn, R. 1979. Comparison of fisheries control systems that utilize catch and effort data. Journal of the Fisheries Research Board of Canada, 36: 1477-1489.
- IWC. 1989. Report of the Comprehensive Assessment Workshop on Management, Reykjavik, 23-25 March 1987. Report of the International Whaling Commission (Special Issue 11): 21-28.
- IWC. 1992. Report of the Sub-Committee on Management Procedures. Report of the International Whaling Commission, 42: 87-136.
- Linhart, H., and Zucchini, W. 1986. Model selection. J. Wiley & Sons, New York. 301 pp.
- Leonart, J., Salat, J., and Macpherson, E. 1985. CVPA, an expanded VPA with cannibalism. Application to a hake population. Fisheries Research, 3: 61-79.
- Ludwig, D., and Walters, C. J. 1985. Are age structured models appropriate for catch-effort data? Canadian Journal of Fisheries and Aquatic Sciences, 42: 1066-1072.
- O'Neill, R. V. 1973. Error analysis of ecological models, pp. 898-90. In Radioecology in ecosystems. Ed. by D. J. Nelson. Proceedings of the 3rd National Symposium on Radioecology. USAEC-CONF-710501.
- Payne, A. I. L., Rose, B., and Leslie, R. W. 1987. Feeding of hake and a first attempt at determining their trophic role in the South African west coast marine environment. In The Benguela and comparable ecosystems. Ed. by A. I. L. Payne, J. A. Gulland, and K. H. Brink. South African Journal of Marine Science, 5: 471-501.
- Peterman, R. M., and Bradford, M. J. 1987. Windspeed and mortality rate of a marine fish, the northern anchovy (*Engraulis mordax*). Science, 235: 354-355.
- Pope, J. G., and Knight, B. J. 1982. Simple models of predation in multiage multispecies fisheries for considering the estimation of fishing mortality and its effects, pp. 64-69 In Multispecies approaches to fisheries management advice. Ed. by M. C. Mercer. Canadian Special Publication of Fisheries and Aquatic Sciences, 59.
- Prenski, L. B. 1980. The food and feeding behaviour of *Merluccius capensis* in Division 1.5 (with some observations on Division 1.4). Collection of Scientific Papers. International Commission for the Southeast Atlantic Fisheries, 7: 283-296.
- Punt, A. E. 1988. Model selection for the dynamics of Southern African hake resources. Report of the Benguela Ecology Programme, South Africa, 15: [viii] + 395 pp.
- Punt, A. E. 1992. Management procedures for Cape hake and baleen whale resources. Report of the Benguela Ecology Programme, South Africa, 23: [viii] + 689 pp.

- Punt, A. E., and Leslie, R. W. 1991. Estimates of some biological parameters for the Cape hake off the South African west coast. *South African Journal of Marine Science*, 10: 271-284.
- Punt, A. E., Leslie, R. W., and du Plessis, S. E. 1992. Estimation of the annual consumption of food by Cape hake (*Merluccius capensis* and *M. paradoxus*) off the South African west coast. In *Benguela trophic functioning*. Ed. by A. J. L. Payne, K. H. Brink, K. H. Mann, and R. Hilborn. *South African Journal of Marine Science*, 12: 611-634.
- Roel, B. A., and Macpherson, E. 1988. Feeding of *Merluccius capensis* and *M. paradoxus* off Namibia. *South African Journal of Marine Science*, 6: 227-243.
- Schaefer, M. B. 1954. Some aspects of the dynamics of populations important to the management of commercial marine fisheries. *Bulletin. Inter-American Tropical Tuna Commission*, 1(2): 25-56.
- Schaefer, M. B. 1957. A study of the dynamics of fishery for yellowfin tuna in the eastern tropical Pacific Ocean. *Bulletin. Inter-American Tropical Tuna Commission*, 2: 247-285.
- Shannon, L. V., Crawford, R. J. M., Brundit, G. B., and Underhill, L. G. 1988. Responses of fish populations in the Benguela ecosystem to environmental change. *Journal de Conseil international pour l'Exploration de la Mer*, 45(1): 5-12.
- Walters, C. J. 1986. *Adaptive management of renewable resources*. Macmillan, New York. 374 pp.
- Walters, C. J., and Collie, J. S. 1988. Is research on environmental factors useful to fisheries management? *Canadian Journal of Fisheries and Aquatic Sciences*, 45: 1848-1854.
